# Supplementary material for: Divergent trajectories and risk profiles of multimorbidity among people living with HIV in China
Source: Research Square preprint supplement (doi:10.21203/rs.3.rs-7498811/v1), 2025-10-16
Supplement: Supplementary file 1 [file 74e7371ecde5c081ad4f1c00.pdf]

## Supplementary material

|                                                                                                                                                                    |           |
|--------------------------------------------------------------------------------------------------------------------------------------------------------------------|-----------|
| <b>1. Supplemental Brief introduction of the Cohort.....</b>                                                                                                       | <b>2</b>  |
| <b>2. Supplemental Table 1. Clinical and laboratory diagnostic criteria for 26 conditions in the study .....</b>                                                   | <b>4</b>  |
| <b>3. Supplemental Table 2. Included ICD-10 codes in each condition .....</b>                                                                                      | <b>9</b>  |
| <b>4. Supplemental Table 3. Classification of the 26 conditions by curability, metabolic status, and infectious status .....</b>                                   | <b>11</b> |
| <b>5. Supplemental Table 4. Distribution of six multimorbidity patterns and dropout across three waves .....</b>                                                   | <b>12</b> |
| <b>6. Supplemental Table 5. Multimorbidity patterns distribution and sex difference in different waves .....</b>                                                   | <b>13</b> |
| <b>7. Supplemental Table 6. Multimorbidity patterns change over time among male participants .....</b>                                                             | <b>15</b> |
| <b>8. Supplemental Table 7. Multimorbidity patterns change over time among female participants .....</b>                                                           | <b>16</b> |
| <b>9. Supplemental Table 8. Multimorbidity patterns distribution and diagnostic age difference in different waves .....</b>                                        | <b>17</b> |
| <b>10. Supplemental Table 9. Multimorbidity patterns change over time among younger (<math>\leq 32</math> years) participants .....</b>                            | <b>19</b> |
| <b>11. Supplemental Table 10. Multimorbidity patterns change over time among older (<math>&gt; 32</math> years) participants .....</b>                             | <b>20</b> |
| <b>12. Supplemental Figure 1. Sensitivity analysis of Cox regression on metabolic-related multimorbidity using an extended 6-month ART initiation window .....</b> | <b>21</b> |

### **Supplemental Brief introduction of the Cohort**

This study is based on a cohort study at the Third People's Hospital of Shenzhen, the only designated hospital for HIV care in Shenzhen, China. The hospital managed approximately 22,000 people living with HIV (PLWH) from 2009 to 2024. Antiretroviral therapy (ART) is provided free-of-charge according to national HIV treatment guidelines. PLWH visit the hospital every three months for continuous ART prescriptions and health monitoring. Before starting ART, comprehensive baseline assessments are conducted, including HIV viral load, T-cell subsets, common opportunistic infections, complete blood count, liver and kidney function, thyroid function, electrocardiogram, bone density, and co-infections (e.g., CMV, HBV, HCV, syphilis, HPV). Detailed patient histories and lifestyle information are also collected. After initiating ART, patients are regularly followed up every three months with routine HIV viral load and T-cell subset testing, and additional tests as needed. The high reimbursement rate of Shenzhen's health insurance policies contributes to a low loss-to-follow-up rate, providing a stable cohort and valuable clinical data for research.

The following are some studies we have conducted based on this cohort:

1. Li T, Sun L, He Y, et al. Increasing trends of overweight and obesity in treatment-naïve people living with HIV in Shenzhen from 2014 to 2020: an emerging health concern. *Front Public Health* 2023; 11:1186838.
2. Sun L, He Y, Xu L, et al. Higher Risk of Dyslipidemia With Coformulated Elvitegravir, Cobicistat, Emtricitabine, and Tenofovir Alafenamide than Efavirenz, Lamivudine, and Tenofovir Disoproxil Fumarate Among Antiretroviral-Naïve People Living With HIV in China. *J Acquir Immune Defic Syndr* 2022; 91: S8-S15.
3. Liu J, Hou Y, Sun L, et al. High population-attributable fractions of traditional risk factors for non-AIDS-defining diseases among people living with HIV in China: a cohort study. *Emerging Microbes & Infections* 2021; 10:416-423.
4. Liu J, Sun L, Hou Y, et al. Barriers to early diagnosis and treatment of persistently high burden of severely immunosuppressed patients with HIV-1: a quantitative and qualitative study. *HIV Medicine* 2020; 21:708-717.
5. Sun LQ, Liu JY, He Y, et al. Evolution of blood lipids and risk factors of dyslipidemia among

people living with human immunodeficiency virus who had received first-line antiretroviral regimens for 3 years in Shenzhen. *Chin Med J* 2020; 133:2808-2815.

6. Li XR, Sun LQ, He Y, et al. HDL-C as a novel predictor of immune reconstitution in people living with HIV: insights from a baseline-to-dynamic change cohort study in China, 2005 – 2022. *Frontiers in Immunology* 2025; 16: 1520615.
7. Luo YS, Sun LQ, He Y, et al. The triglyceride-glucose index trajectories are associated with cardiovascular diseases in people living with HIV: evidence from a prospective cohort study in China, 2005–2022. *BMC Public Health* 2025; 25: 465.

**Supplemental Table 1. Clinical and laboratory diagnostic criteria for 26 conditions in the study**

| <b>Condition</b> |                                                                                 | <b>Clinical and laboratory diagnostic criteria</b>                                                                                       |
|------------------|---------------------------------------------------------------------------------|------------------------------------------------------------------------------------------------------------------------------------------|
| 1                | Hypertension [1]                                                                | Blood pressure $\geq 140/90$ mmHg                                                                                                        |
| 2                | Diabetes Mellitus [2]                                                           | HbA1c $\geq 6.5\%$ , fasting plasma glucose $\geq 126$ mg/dL, or use of antidiabetic medications, or a self-reported history of diabetes |
| 3                | Dyslipidemia [3]                                                                | TC $\geq 5.2$ mmol/L, HDL-C $\leq 1.0$ mmol/L, LDL-C $\geq 3.4$ mmol/L, or TG $\geq 1.7$ mmol/L                                          |
| 4                | Cardiovascular Disease [4]                                                      | Confirmed by ECG, echocardiography, cardiac biomarkers, or coronary angiography                                                          |
| 5                | COPD (Chronic Obstructive Pulmonary Disease), Emphysema, Chronic Bronchitis [5] | FEV1/FVC $< 0.70$ ; use of anticholinergics                                                                                              |
| 6                | Diseases of Esophagus, Stomach, and Duodenum [6]                                | Diagnosis based on endoscopy, biopsy, or imaging                                                                                         |
| 7                | Hepatitis B (HBV) [7]                                                           | Persistent HBsAg positivity $> 6$ months                                                                                                 |
| 8                | Hepatitis C (HCV) [8]                                                           | Positive anti-HCV and HCV RNA                                                                                                            |
| 9                | Chronic kidney disease (CKD) [9]                                                | Glomerular filtration rate $< 60$ mL/min/1.73 m <sup>2</sup> for $\geq 3$ months (assessed using the CKD-EPI equation)                   |
| 10               | Non-AIDS-related cancers [10]                                                   | Histopathological confirmation                                                                                                           |
| 11               | Osteoporosis [11]                                                               | Bone mineral density T-score $\leq -2.5$                                                                                                 |
| 12               | Mental health disorders [12]                                                    | Diagnosis per DSM-5                                                                                                                      |
| 13               | Sleep disorders [13]                                                            | Diagnosis per ICSD-3 and PSG                                                                                                             |
| 14               | Syphilis [14]                                                                   | Positive RPR/VDRL and TPPA/FTA-ABS                                                                                                       |
| 15               | Human papillomavirus (HPV) infection [15]                                       | Positive high-risk HPV DNA                                                                                                               |
| 16               | Chronic liver disease (CLD) excluding viral hepatitis [16]                      | Abnormal liver function with imaging or pathology, excluding HBV/HCV                                                                     |
| 17               | AIDS-defining cancers [17]                                                      | Kaposi sarcoma, cervical cancer, or aggressive                                                                                           |

|    |                                              |                                                                 |
|----|----------------------------------------------|-----------------------------------------------------------------|
|    |                                              | B-cell lymphoma                                                 |
| 18 | HIV-associated encephalopathy [18]           | Cognitive decline in HIV+ after excluding other causes          |
| 19 | Pneumocystis jirovecii pneumonia (PJP) [19]  | Radiologic findings and P. jirovecii in BAL or sputum           |
| 20 | Nontuberculous mycobacterial infections [20] | ≥2 positive sputum cultures and compatible imaging              |
| 21 | Cytomegalovirus (CMV) infection [21]         | CMV DNA PCR or inclusion bodies                                 |
| 22 | Herpes simplex virus (HSV) infection [22]    | Positive PCR or viral culture                                   |
| 23 | Varicella-zoster virus (VZV) infection [23]  | Clinical rash and positive PCR                                  |
| 24 | Toxoplasmosis [24]                           | Positive IgM/IgG or CSF Toxoplasma DNA                          |
| 25 | Fungal infections [25]                       | Positive culture, microscopy, or serology (e.g., beta-D-glucan) |
| 26 | Tuberculosis (TB) [26]                       | AFB smear, culture, or PCR with radiographic evidence           |

**Reference** (ordered according to the 26 diseases):

1. Mancia G, Kreutz R, Brunström M, et al. 2023 ESH Guidelines for the management of arterial hypertension: The Task Force for the management of arterial hypertension of the European Society of Hypertension. *J Hypertens*. 2023;41(12):1874–2071. doi:10.1097/HJH.0000000000003480
2. American Diabetes Association. Standards of Medical Care in Diabetes—2024. *Diabetes Care*. 2024;47(Suppl 1):S1–S350. doi:10.2337/dc24-S001
3. Joint Committee for the Revision of Guidelines for the Management of Blood Lipids in China. Chinese guidelines for the management of blood lipids (2023 edition). *Chinese Circulation Journal*. 2023;38(3):237–271. (In Chinese). doi: 10.3969/j.issn.1000-3614.2023.03.001
4. Goff DC Jr, Lloyd-Jones DM, Bennett G, et al. ACC/AHA Guideline on the Assessment of Cardiovascular Risk. *J Am Coll Cardiol*. 2014;63(25 Pt B):2935–2959. doi:10.1016/j.jacc.2013.11.005
5. Global Initiative for Chronic Obstructive Lung Disease (GOLD). Global Strategy for the Diagnosis, Management, and Prevention of COPD – 2023 Report. Available at: <https://goldcopd.org>
6. Katz PO, Dunbar KB, Schnoll-Sussman FH, et al. ACG Clinical Guideline for the Diagnosis and Management of GERD. *Am J Gastroenterol*. 2022;117(1):27–56. doi:10.14309/ajg.0000000000001538
7. World Health Organization. Guidelines for the prevention, care and treatment of persons with chronic hepatitis B infection. WHO; 2015. Available at: <https://www.who.int/publications/i/item/9789241549059>
8. Centers for Disease Control and Prevention (CDC). Hepatitis C Guidance: Testing, Management, and Treatment. Updated 2023. Available at: <https://www.cdc.gov/hepatitis/hcv/index.htm>
9. Kidney Disease: Improving Global Outcomes (KDIGO) CKD Work Group. KDIGO 2024 Clinical Practice Guideline for the Evaluation and Management of Chronic Kidney Disease. *Kidney Int*. 2024;105(4S):S117-S314. doi:10.1016/j.kint.2023.10.018
10. National Comprehensive Cancer Network (NCCN). NCCN Clinical Practice Guidelines in Oncology. Various editions by cancer type. Available at: <https://www.nccn.org>
11. Cosman F, de Beur SJ, LeBoff MS, et al. Clinician’s Guide to Prevention and Treatment of Osteoporosis. *Osteoporos Int*. 2014;25(10):2359–2381. doi:10.1007/s00198-014-2794-2
12. American Psychiatric Association. Diagnostic and Statistical Manual of Mental Disorders, Fifth Edition (DSM-5). American Psychiatric Publishing; 2013. Available at: <https://www.psychiatry.org/psychiatrists/practice/dsm>

13. American Academy of Sleep Medicine. International Classification of Sleep Disorders—Third Edition (ICSD-3). 2014. Available at: <https://aasm.org/clinical-resources/international-classification-sleep-disorders/>
14. Centers for Disease Control and Prevention. Sexually Transmitted Infections Treatment Guidelines, 2021. MMWR Recomm Rep. 2021;70(4):1–187. doi:10.15585/mmwr.rr7004a1
15. World Health Organization. WHO Guidelines for Screening and Treatment of Precancerous Lesions for Cervical Cancer Prevention. 2nd edition. 2021. Available at: <https://www.who.int/publications/i/item/9789240030824>
16. Chalasani N, Younossi Z, Lavine JE, et al. The diagnosis and management of nonalcoholic fatty liver disease: Practice guidance from the American Association for the Study of Liver Diseases. Hepatology. 2018;67(1):328–357. doi:10.1002/hep.29367
17. Centers for Disease Control and Prevention. AIDS-Defining Conditions. Available at: <https://www.cdc.gov/hiv/library/reports/hiv-surveillance/vol-32/content/appendix-c.html>
18. Panel on Antiretroviral Guidelines for Adults and Adolescents. Guidelines for the Use of Antiretroviral Agents in Adults and Adolescents with HIV. U.S. Department of Health and Human Services. Updated May 13, 2025. Available at: <https://clinicalinfo.hiv.gov/en/guidelines/adult-and-adolescent-arv>.
19. Panel on Opportunistic Infections in Adults and Adolescents with HIV. Guidelines for the Prevention and Treatment of Opportunistic Infections. Updated 2022. Available at: <https://clinicalinfo.hiv.gov>
20. Daley CL, Iaccarino JM, Lange C, et al. Treatment of Nontuberculous Mycobacterial Pulmonary Disease: An Official ATS/ERS/ESCMID/IDSA Clinical Practice Guideline. Clin Infect Dis. 2020;71(4):e1–e36. doi:10.1093/cid/ciz236
21. Kotton CN, Kumar D, Caliendo AM, et al. The Third International Consensus Guidelines on the Management of Cytomegalovirus in Solid Organ Transplantation. Transplantation. 2018;102(6):900–931. doi:10.1097/TP.0000000000002191
22. Centers for Disease Control and Prevention. Sexually Transmitted Infections Treatment Guidelines, 2021. MMWR Recomm Rep. 2021;70(4):1–187. doi:10.15585/mmwr.rr7004a1
23. Centers for Disease Control and Prevention. Varicella-Zoster Virus Infection. Available at: <https://www.cdc.gov/chickenpox>

24. Centers for Disease Control and Prevention. Guidelines for the Prevention and Treatment of Opportunistic Infections in HIV-Infected Adults and Adolescents. Updated 2022.
25. Pappas PG, Kauffman CA, Andes DR, et al. Clinical Practice Guideline for the Management of Candidiasis: 2016 Update by the Infectious Diseases Society of America. Clin Infect Dis. 2016;62(4):e1–e50. doi:10.1093/cid/civ933
26. World Health Organization. WHO consolidated guidelines on tuberculosis. Module 3: Diagnosis – Rapid diagnostics for tuberculosis detection. 2022. Available at: <https://www.who.int/publications/i/item/9789240047327>



**Supplemental Table 2. Included ICD-10 codes in each condition**

| Condition |                                                                             | ICD-10                                                                                                              |
|-----------|-----------------------------------------------------------------------------|---------------------------------------------------------------------------------------------------------------------|
| 1         | Hypertension                                                                | I10-I15                                                                                                             |
| 2         | Diabetes Mellitus                                                           | E10-E14                                                                                                             |
| 3         | Dyslipidemia                                                                | E78                                                                                                                 |
| 4         | Cardiovascular Disease                                                      | I20-I25, I63-I69, I10-I15                                                                                           |
| 5         | COPD (Chronic Obstructive Pulmonary Disease), Emphysema, Chronic Bronchitis | J41-J44, J47                                                                                                        |
| 6         | Diseases of Esophagus, Stomach, and Duodenum                                | I85, K21-K22, K224-K227, K230-K231, K254-K257, K264-K267, K274-K277, K284-K287, K293-K299, K311-K315, Q39-Q40, Z903 |
| 7         | Chronic Hepatitis B                                                         | B15, B17.2, B18 (exclude B18.2)                                                                                     |
| 8         | Chronic Hepatitis C                                                         | B18.2                                                                                                               |
| 9         | Chronic kidney disease (CKD)                                                | K70-K74, K76.0                                                                                                      |
| 10        | Non-AIDS-related cancers                                                    | I120-I139, N01-N05, N07-N08, N11, N183-N189, Q60-Q61, Q618-Q619, Z905, Z940                                         |
| 11        | Osteoporosis                                                                | C00-C45, C47-C82, C83.1-C83.9, C84-C85.8, C86-C96                                                                   |
| 12        | Mental health disorders                                                     | M80-M82                                                                                                             |
| 13        | Sleep disorders                                                             | F20-F48                                                                                                             |
| 14        | Syphilis                                                                    | F51.0-F51.3, G47                                                                                                    |
| 15        | Human papillomavirus (HPV) infection                                        | A50-A53                                                                                                             |
| 16        | Chronic liver disease excluding viral hepatitis                             | A63.0, B07, B97.7, D06, D10.5, D14.1, N87.1-N87.9, N89.0-N89.1, N90.0-N90.1, K62.8                                  |
| 17        | AIDS-defining cancers                                                       | C46, C53, C83.0, C85.9                                                                                              |
| 18        | HIV-associated encephalopathy                                               | B22                                                                                                                 |
| 19        | Pneumocystis jirovecii pneumonia (PJP)                                      | B59                                                                                                                 |

|    |                                         |               |
|----|-----------------------------------------|---------------|
| 20 | Nontuberculous mycobacterial infections | A31           |
| 21 | Cytomegalovirus (CMV) infection         | B25           |
| 22 | Herpes simplex virus (HSV) infection    | B00           |
| 23 | Varicella-zoster virus (VZV) infection  | B01, B02      |
| 24 | Toxoplasmosis                           | B58           |
| 25 | Fungal infections                       | B37, B45, B48 |
| 26 | Tuberculosis                            | A15-A19       |

**Supplemental Table 3. Classification of the 26 conditions by curability, metabolic status, and infectious status**

| Category          | Classification           | Condition number*                                                            |
|-------------------|--------------------------|------------------------------------------------------------------------------|
| Curability        | Curable condition        | 8, 13, 14, 15, 19, 21, 22, 23, 24, 25, 26                                    |
|                   | Non-curable condition    | 1, 2, 3, 4, 5, 6, 7, 9, 10, 11, 12, 16, 17, 18, 20                           |
| Metabolic status  | Metabolic condition      | 1, 2, 3, 11, 16                                                              |
|                   | Non-metabolic condition  | 4, 5, 6, 7, 8, 9, 10, 12, 13, 14, 15, 17, 18, 19, 20, 21, 22, 23, 24, 25, 26 |
| Infectious status | Infectious condition     | 7, 8, 14, 15, 19, 20, 21, 22, 23, 24, 25, 26                                 |
|                   | Non-infectious condition | 1, 2, 3, 4, 5, 6, 9, 10, 11, 12, 13, 16, 17, 18                              |

\* Condition number refers to the numbered disease entities listed in Supplemental Table 1.

**Supplemental Table 4. Distribution of six multimorbidity patterns and dropout across three waves**

| <b>Category</b>                         | <b>Total,<br/>N</b> | <b>Proportion,<br/>%</b> | <b>Category (Baseline to<br/>4-year)</b> | <b>Total,<br/>N</b> | <b>Proportion,<br/>%</b> | <b>Category (4-year to 8-year)</b>      | <b>Total,<br/>N</b> | <b>Proportion,<br/>%</b> |
|-----------------------------------------|---------------------|--------------------------|------------------------------------------|---------------------|--------------------------|-----------------------------------------|---------------------|--------------------------|
| Incurable multimorbidity<br>pattern     | 456                 | 7.66                     | Incurable multimorbidity<br>pattern      | 1120                | 18.82                    | Incurable multimorbidity<br>pattern     | 1517                | 25.50                    |
| Curable multimorbidity<br>pattern       | 46                  | 0.77                     | Curable multimorbidity<br>pattern        | 7                   | 0.12                     | Curable multimorbidity<br>pattern       | 4                   | 0.07                     |
| Mixed curable multimorbidity<br>pattern | 1037                | 17.43                    | Mixed curable multimorbidity<br>pattern  | 1042                | 17.51                    | Mixed curable multimorbidity<br>pattern | 1007                | 16.92                    |
| Single incurable disease                | 2739                | 46.03                    | Single incurable disease                 | 3086                | 51.87                    | Single incurable disease                | 2665                | 44.79                    |
| Single curable disease                  | 208                 | 3.50                     | Single curable disease                   | 60                  | 1.01                     | Single curable disease                  | 16                  | 0.27                     |
| No disease                              | 1464                | 24.61                    | No disease                               | 493                 | 8.29                     | No disease                              | 192                 | 3.23                     |
| Dropout                                 | 0                   | 0.00                     | Dropout                                  | 142                 | 2.39                     | Dropout                                 | 549                 | 9.23                     |

Counts (N) and proportions (%) are shown for Baseline, Baseline to 4-year (Wave1), and 4-year to 8-year (Wave2). “Incurable/Curable/Mixed curable” multimorbidity patterns follow the classification in Supplemental Table 3; “Dropout” denotes participants without follow-up data in the specified interval.

**Supplemental Table 5. Multimorbidity patterns distribution and sex difference in different waves**

| Category                             | Male   |               | Female |               | Test type  | P-value |
|--------------------------------------|--------|---------------|--------|---------------|------------|---------|
|                                      | Counts | Proportion, % | Counts | Proportion, % |            |         |
| Baseline                             |        |               |        |               |            |         |
| Incurable multimorbidity pattern     | 411    | 7.95          | 45     | 5.78          | Chi-square | <0.05   |
| Curable multimorbidity pattern       | 44     | 0.85          | 2      | 0.26          | Fisher     | 0.08    |
| Mixed curable multimorbidity pattern | 938    | 18.14         | 99     | 12.71         | Chi-square | <0.01   |
| Single incurable disease             | 2385   | 46.12         | 354    | 45.44         | Chi-square | 0.75    |
| Single curable disease               | 196    | 3.79          | 12     | 1.54          | Chi-square | <0.01   |
| No disease                           | 1197   | 23.15         | 267    | 34.27         | Chi-square | <0.01   |
| Dropout                              | 0      | 0.00          | 0      | 0.00          | Fisher     | 1.00    |
| Baseline to 4-year                   |        |               |        |               |            |         |
| Incurable multimorbidity pattern     | 987    | 19.09         | 133    | 17.07         | Chi-square | 0.20    |
| Curable multimorbidity pattern       | 5      | 0.10          | 2      | 0.26          | Fisher     | 0.23    |
| Mixed curable multimorbidity pattern | 956    | 18.49         | 86     | 11.04         | Chi-square | <0.01   |
| Single incurable disease             | 2640   | 51.05         | 446    | 57.25         | Chi-square | <0.01   |
| Single curable disease               | 59     | 1.14          | 1      | 0.13          | Fisher     | <0.01   |

|                                      |      |       |     |       |            |       |
|--------------------------------------|------|-------|-----|-------|------------|-------|
| No disease                           | 401  | 7.75  | 92  | 11.81 | Chi-square | <0.01 |
| Dropout                              | 123  | 2.38  | 19  | 2.44  | Chi-square | 1.00  |
| <b>4-year to 8-year</b>              |      |       |     |       |            |       |
| Incurable multimorbidity pattern     | 1340 | 25.91 | 177 | 22.72 | Chi-square | 0.06  |
| Curable multimorbidity pattern       | 3    | 0.10  | 1   | 0.13  | Fisher     | 0.43  |
| Mixed curable multimorbidity pattern | 928  | 17.95 | 79  | 10.14 | Chi-square | <0.01 |
| Single incurable disease             | 2275 | 44.00 | 390 | 50.06 | Chi-square | <0.01 |
| Single curable disease               | 14   | 0.27  | 2   | 0.26  | Fisher     | 1.00  |
| No disease                           | 158  | 3.06  | 34  | 4.36  | Chi-square | 0.07  |
| Dropout                              | 453  | 8.76  | 96  | 12.32 | Chi-square | <0.01 |

Counts and proportions by sex across Baseline, Wave1, and Wave2; P-values from chi-square or Fisher's exact tests.

**Supplemental Table 6. Multimorbidity patterns change over time among male participants**

| Wave comparison   | Category                             | Test type  | P- value |
|-------------------|--------------------------------------|------------|----------|
| Baseline vs Wave1 | Incurable multimorbidity pattern     | Chi-square | <0.01    |
|                   | Curable multimorbidity pattern       | Chi-square | <0.01    |
|                   | Mixed curable multimorbidity pattern | Chi-square | 0.67     |
|                   | Single incurable disease             | Chi-square | <0.01    |
|                   | Single curable disease               | Chi-square | <0.01    |
|                   | No disease                           | Chi-square | <0.01    |
|                   | Dropout                              | Fisher     | <0.01    |
| Wave1 vs Wave2    | Incurable multimorbidity pattern     | Chi-square | <0.01    |
|                   | Curable multimorbidity pattern       | Fisher     | 0.73     |
|                   | Mixed curable multimorbidity pattern | Chi-square | 0.49     |
|                   | Single incurable disease             | Chi-square | <0.01    |
|                   | Single curable disease               | Chi-square | <0.01    |
|                   | No disease                           | Chi-square | <0.01    |
|                   | Dropout                              | Chi-square | <0.01    |
| Baseline vs Wave2 | Incurable multimorbidity pattern     | Chi-square | <0.01    |
|                   | Curable multimorbidity pattern       | Fisher     | <0.01    |
|                   | Mixed curable multimorbidity pattern | Chi-square | 0.82     |
|                   | Single incurable disease             | Chi-square | <0.05    |
|                   | Single curable disease               | Chi-square | <0.01    |
|                   | No disease                           | Chi-square | <0.01    |
|                   | Dropout                              | Fisher     | <0.01    |

P-values are from chi-square tests (or Fisher's exact tests where appropriate) comparing Baseline vs Wave1 (Baseline to 4-year), Wave1 vs Wave2 (4-year to 8-year), and Baseline vs Wave2.

**Supplemental Table 7. Multimorbidity patterns change over time among female participants**

| <b>Wave comparison</b> | <b>Category</b>                      | <b>Test type</b> | <b>P- value</b> |
|------------------------|--------------------------------------|------------------|-----------------|
| Baseline vs Wave1      | Incurable multimorbidity pattern     | Chi-square       | <0.01           |
|                        | Curable multimorbidity pattern       | Fisher           | 1.00            |
|                        | Mixed curable multimorbidity pattern | Chi-square       | 0.35            |
|                        | Single incurable disease             | Chi-square       | <0.01           |
|                        | Single curable disease               | Fisher           | <0.01           |
|                        | No disease                           | Chi-square       | <0.01           |
|                        | Dropout                              | Fisher           | <0.01           |
| Wave1 vs Wave2         | Incurable multimorbidity pattern     | Chi-square       | <0.01           |
|                        | Curable multimorbidity pattern       | Fisher           | 1.00            |
|                        | Mixed curable multimorbidity pattern | Chi-square       | 0.62            |
|                        | Single incurable disease             | Chi-square       | <0.01           |
|                        | Single curable disease               | Fisher           | 1.00            |
|                        | No disease                           | Chi-square       | <0.01           |
|                        | Dropout                              | Chi-square       | <0.01           |
| Baseline vs Wave2      | Incurable multimorbidity pattern     | Chi-square       | <0.01           |
|                        | Curable multimorbidity pattern       | Fisher           | 1.00            |
|                        | Mixed curable multimorbidity pattern | Chi-square       | 0.13            |
|                        | Single incurable disease             | Chi-square       | 0.08            |
|                        | Single curable disease               | Fisher           | <0.05           |
|                        | No disease                           | Chi-square       | <0.01           |
|                        | Dropout                              | Fisher           | <0.01           |

P-values are from chi-square tests (or Fisher's exact tests where appropriate) for Baseline vs Wave1, Wave1 vs Wave2, and Baseline vs Wave2. Wave definitions as above.



**Supplemental Table 8. Multimorbidity patterns distribution and diagnostic age difference in different waves**

| Category                             | ≤32 years |               | >32 years |               | Test type  | P-value |
|--------------------------------------|-----------|---------------|-----------|---------------|------------|---------|
|                                      | Counts    | Proportion, % | Counts    | Proportion, % |            |         |
| Baseline                             |           |               |           |               |            |         |
| Incurable multimorbidity pattern     | 159       | 5.18          | 297       | 10.30         | Chi-square | <0.01   |
| Curable multimorbidity pattern       | 24        | 0.78          | 22        | 0.76          | Chi-square | 1.00    |
| Mixed curable multimorbidity pattern | 452       | 14.74         | 585       | 20.29         | Chi-square | <0.01   |
| Single incurable disease             | 1414      | 46.10         | 1325      | 45.96         | Chi-square | <0.01   |
| Single curable disease               | 139       | 4.53          | 69        | 2.39          | Chi-square | 0.93    |
| No disease                           | 879       | 28.66         | 585       | 20.29         | Chi-square | <0.01   |
| Dropout                              | 0         | 0.00          | 0         | 0.00          | Fisher     | 1.00    |
| Baseline to 4-year                   |           |               |           |               |            |         |
| Incurable multimorbidity pattern     | 394       | 12.85         | 726       | 25.18         | Chi-square | <0.01   |
| Curable multimorbidity pattern       | 4         | 0.13          | 3         | 0.10          | Fisher     | 1.00    |
| Mixed curable multimorbidity pattern | 580       | 18.91         | 462       | 16.02         | Chi-square | <0.01   |
| Single incurable disease             | 1659      | 54.09         | 1427      | 49.50         | Chi-square | <0.01   |
| Single curable disease               | 43        | 1.40          | 17        | 0.59          | Chi-square | <0.01   |

|                                      |      |       |      |       |            |       |
|--------------------------------------|------|-------|------|-------|------------|-------|
| No disease                           | 317  | 10.34 | 176  | 6.10  | Chi-square | <0.01 |
| Dropout                              | 70   | 2.28  | 72   | 2.50  | Chi-square | 0.65  |
| <b>4 to 8-year</b>                   |      |       |      |       |            |       |
| Incurable multimorbidity pattern     | 606  | 19.76 | 911  | 31.60 | Chi-square | <0.01 |
| Curable multimorbidity pattern       | 2    | 0.07  | 2    | 0.07  | Fisher     | 1.00  |
| Mixed curable multimorbidity pattern | 540  | 17.61 | 467  | 16.20 | Chi-square | 0.16  |
| Single incurable disease             | 1501 | 48.94 | 1164 | 40.37 | Chi-square | <0.01 |
| Single curable disease               | 11   | 0.36  | 5    | 0.17  | Chi-square | 0.26  |
| No disease                           | 134  | 4.37  | 58   | 2.01  | Chi-square | <0.01 |
| Dropout                              | 273  | 8.90  | 276  | 9.57  | Chi-square | 0.40  |

Counts and proportions are presented at Baseline, Wave1, and Wave2 with P-values from chi-square or Fisher's exact tests as indicated.

**Supplemental Table 9. Multimorbidity patterns change over time among younger ( $\leq 32$  years) participants**

| Wave comparison   | Category                             | Test type  | P- value |
|-------------------|--------------------------------------|------------|----------|
| Baseline vs Wave1 | Incurable multimorbidity pattern     | Chi-square | <0.01    |
|                   | Curable multimorbidity pattern       | Fisher     | <0.01    |
|                   | Mixed curable multimorbidity pattern | Chi-square | <0.01    |
|                   | Single incurable disease             | Chi-square | <0.01    |
|                   | Single curable disease               | Chi-square | <0.01    |
|                   | No disease                           | Chi-square | <0.01    |
|                   | Dropout                              | Fisher     | <0.01    |
| Wave1 vs Wave2    | Incurable multimorbidity pattern     | Chi-square | <0.01    |
|                   | Curable multimorbidity pattern       | Fisher     | 0.69     |
|                   | Mixed curable multimorbidity pattern | Chi-square | 0.20     |
|                   | Single incurable disease             | Chi-square | <0.01    |
|                   | Single curable disease               | Chi-square | <0.01    |
|                   | No disease                           | Chi-square | <0.01    |
|                   | Dropout                              | Chi-square | <0.01    |
| Baseline vs Wave2 | Incurable multimorbidity pattern     | Chi-square | <0.01    |
|                   | Curable multimorbidity pattern       | Fisher     | <0.01    |
|                   | Mixed curable multimorbidity pattern | Chi-square | <0.01    |
|                   | Single incurable disease             | Chi-square | <0.05    |
|                   | Single curable disease               | Chi-square | <0.01    |
|                   | No disease                           | Chi-square | <0.01    |
|                   | Dropout                              | Fisher     | <0.01    |

P-values are from chi-square tests (or Fisher's exact tests where appropriate) comparing Baseline vs Wave1, Wave1 vs Wave2, and Baseline vs Wave2.

**Supplemental Table 10. Multimorbidity patterns change over time among older (>32 years) participants**

| Wave comparison   | Category                             | Test type  | P- value |
|-------------------|--------------------------------------|------------|----------|
| Baseline vs Wave1 | Incurable multimorbidity pattern     | Chi-square | <0.01    |
|                   | Curable multimorbidity pattern       | Fisher     | <0.01    |
|                   | Mixed curable multimorbidity pattern | Chi-square | <0.01    |
|                   | Single incurable disease             | Chi-square | <0.01    |
|                   | Single curable disease               | Chi-square | <0.01    |
|                   | No disease                           | Chi-square | <0.01    |
|                   | Dropout                              | Fisher     | <0.01    |
| Wave1 vs Wave2    | Incurable multimorbidity pattern     | Chi-square | <0.01    |
|                   | Curable multimorbidity pattern       | Fisher     | 1.00     |
|                   | Mixed curable multimorbidity pattern | Chi-square | 0.89     |
|                   | Single incurable disease             | Chi-square | <0.01    |
|                   | Single curable disease               | Chi-square | <0.05    |
|                   | No disease                           | Chi-square | <0.01    |
|                   | Dropout                              | Chi-square | <0.01    |
| Baseline vs Wave2 | Incurable multimorbidity pattern     | Chi-square | <0.01    |
|                   | Curable multimorbidity pattern       | Fisher     | <0.01    |
|                   | Mixed curable multimorbidity pattern | Chi-square | <0.01    |
|                   | Single incurable disease             | Chi-square | <0.01    |
|                   | Single curable disease               | Chi-square | <0.01    |
|                   | No disease                           | Chi-square | <0.01    |
|                   | Dropout                              | Fisher     | <0.01    |

P-values are from chi-square tests (or Fisher's exact tests where appropriate) comparing Baseline vs Wave1, Wave1 vs Wave2, and Baseline vs Wave2.

**Supplemental Figure 1. Sensitivity analysis of Cox regression on metabolic multimorbidity using an extended 6-month ART initiation window**

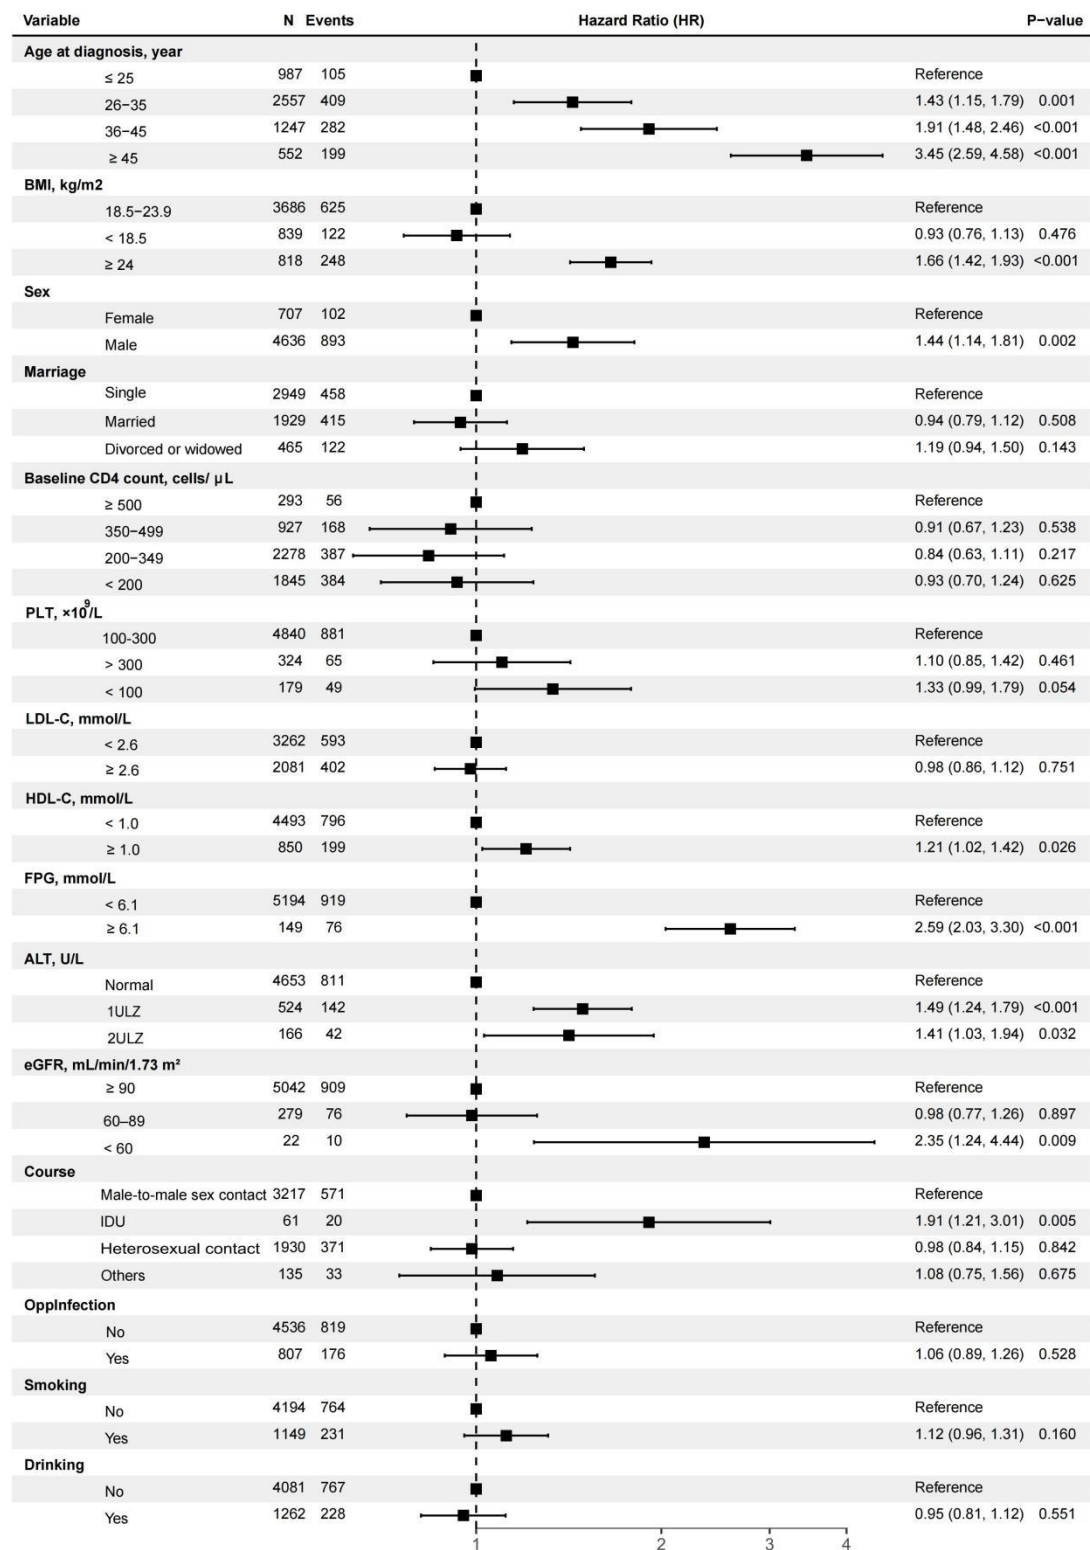

Forest plot from the sensitivity analysis using Cox regression. ART initiation within 6 months was used as the baseline definition for metabolic multimorbidity outcomes.
