# Supplementary material for: Divergent trajectories and risk profiles of multimorbidity among people living with HIV in China
Source: Research Square preprint supplement (doi:10.21203/rs.3.rs-7498811/v1), 2025-10-16
Supplement: Supplementary file 1 [file d0cc37d6ce64d94390e1b06f.docx]

Multimorbidity prevalence in PLWH rose from 25.9% to 42.5% over 8 years.

Multimorbidity patterns shifted from infectious toward metabolic forms.

Dyslipidemia-related clusters were the most common multimorbidity combinations.

Distinct risk profiles identified for metabolic and infectious–non-infectious patterns.

Findings support targeted prevention and long-term care for high-risk PLWH.
